# Supplementary material
Source: publisher figshare collection journal article supplement (https://tandf.figshare.com/articles/dataset/_/17069974)
Supplement: Supplementary file 1 [file 1]

## Supplementary Material 2

Top-20 selected items from the HealthFan survey for people from different subpopulations (i.e. age categories, sex, origin of limb loss, level of limb loss, and type of prosthesis used most).

### 1. Age categories

| Ranking | 18 – 40 years (N = 66)                  |           | 41 – 65 years (N = 169)          |           | ≥ 66 years (N = 95)                     |           |
|---------|-----------------------------------------|-----------|----------------------------------|-----------|-----------------------------------------|-----------|
|         | Item                                    | N (%)     | Item                             | N (%)     | Item                                    | N (%)     |
| 1       | Wearing comfort                         | 32 (48.5) | Wearing comfort                  | 95 (56.2) | Wearing comfort                         | 50 (52.6) |
| 2       | Weight                                  | 29 (43.9) | Grabbing, picking up and holding | 64 (37.9) | Need for prosthesis                     | 33 (34.7) |
| 3       | Work/job                                | 23 (34.8) | Functionality                    | 52 (30.8) | Independence                            | 28 (29.5) |
| 4       | Independence                            | 22 (33.3) | Independence                     | 51 (30.2) | Grabbing, picking up and holding        | 28 (29.5) |
| 5       | Grabbing, picking up and holding        | 22 (33.3) | Work/job                         | 49 (29.0) | Weight                                  | 28 (29.5) |
| 6       | Ease of control                         | 21 (31.8) | Household                        | 47 (27.8) | Life-like appearance                    | 27 (28.4) |
| 7       | Usability                               | 21 (31.8) | Life-like appearance             | 47 (27.8) | Functionality                           | 27 (28.4) |
| 8       | Functionality                           | 21 (31.8) | Weight                           | 46 (27.2) | Self-care                               | 26 (27.4) |
| 9       | Household                               | 19 (28.8) | Overuse complaints               | 45 (26.6) | Prosthesis fit                          | 25 (26.3) |
| 10      | Anonymity                               | 19 (28.8) | Heat/sweating                    | 42 (24.9) | Household                               | 24 (25.3) |
| 11      | Heat/ sweating                          | 18 (27.3) | Usability                        | 41 (24.3) | Feeling comfortable                     | 22 (23.2) |
| 12      | Reliability                             | 17 (25.8) | Need for prosthesis              | 40 (23.7) | Donning/doffing                         | 22 (23.2) |
| 13      | Self-confidence                         | 16 (24.2) | Reliability                      | 40 (23.7) | Heat/sweating                           | 21 (22.1) |
| 14      | Overuse complaints                      | 16 (24.2) | Feeling comfortable              | 38 (22.5) | Usability                               | 21 (22.1) |
| 15      | Life-like appearance                    | 15 (22.7) | Transport                        | 37 (21.9) | Appearance in combination with clothing | 20 (21.1) |
| 16      | Embodiment                              | 14 (21.2) | Self-care                        | 35 (20.7) | Stabilize/support objects               | 20 (21.1) |
| 17      | Self-care                               | 13 (19.7) | Ease of control                  | 35 (20.7) | Phantom limb pain                       | 19 (20.0) |
| 18      | Feeling comfortable                     | 13 (19.7) | Prosthesis fit                   | 34 (20.1) | Phantom limb feeling                    | 19 (20.0) |
| 19      | Water/dirt proof                        | 12 (18.2) | Donning/doffing                  | 34 (20.1) | Reliability                             | 19 (20.0) |
| 20      | Appearance in combination with clothing | 12 (18.2) | Anonymity                        | 33 (19.5) | Anonymity                               | 19 (20.0) |
|         | Leisure activities                      | 12 (18.2) |                                  |           |                                         |           |
|         | Vulnerability/robustness                | 12 (18.2) |                                  |           |                                         |           |
|         | Natural movements                       | 12 (18.2) |                                  |           |                                         |           |

### 2. Sex

| Ranking | Men (N = 181)                    |           | Women (N = 144)                         |           |
|---------|----------------------------------|-----------|-----------------------------------------|-----------|
|         | Item                             | N (%)     | Item                                    | N (%)     |
| 1       | Wearing comfort                  | 98 (54.1) | Wearing comfort                         | 77 (53.5) |
| 2       | Grabbing, picking up and holding | 70 (38.7) | Independence                            | 54 (37.5) |
| 3       | Functionality                    | 61 (33.7) | Weight                                  | 50 (34.7) |
| 4       | Work/job                         | 50 (27.6) | Household                               | 49 (34.0) |
| 5       | Weight                           | 50 (27.6) | Life-like appearance                    | 46 (31.9) |
| 6       | Ease of control                  | 49 (27.1) | Overuse complaints                      | 44 (30.6) |
| 7       | Reliability                      | 49 (27.1) | Grabbing, picking up and holding        | 42 (29.2) |
| 8       | Independence                     | 45 (24.9) | Anonymity                               | 40 (27.8) |
| 9       | Heat/sweating                    | 45 (24.9) | Need for prosthesis                     | 37 (25.7) |
| 10      | Usability                        | 45 (24.9) | Heat/sweating                           | 37 (25.7) |
| 11      | Need for prosthesis              | 44 (24.3) | Functionality                           | 36 (25.0) |
| 12      | Life-like appearance             | 43 (23.8) | Usability                               | 35 (24.3) |
| 13      | Feeling comfortable              | 42 (23.2) | Appearance in combination with clothing | 33 (22.9) |
| 14      | Self-care                        | 41 (22.7) | Work/job                                | 32 (22.2) |
| 15      | Prosthesis fit                   | 40 (22.1) | Self-care                               | 32 (22.2) |
| 16      | Vulnerability/robustness         | 39 (21.5) | Embodiment                              | 32 (22.2) |
| 17      | Donning/doffing                  | 39 (21.5) | Self-confidence                         | 30 (20.8) |
| 18      | Household                        | 37 (20.4) | Feeling comfortable                     | 29 (20.1) |
| 19      | Phantom limb pain                | 34 (18.8) | Prosthesis fit                          | 28 (19.4) |
| 20      | Overuse complaints               | 32 (17.7) | Donning/doffing                         | 27 (18.8) |

### 3. Origin of limb loss

| Ranking | Congenital (N = 126)             |           | Acquired amputation (N = 210)    |            |
|---------|----------------------------------|-----------|----------------------------------|------------|
|         | Item                             | N (%)     | Item                             | N (%)      |
| 1       | Wearing comfort                  | 68 (54.0) | Wearing comfort                  | 112 (53.3) |
| 2       | Weight                           | 49 (38.9) | Grabbing, picking up and holding | 70 (33.3)  |
| 3       | Life-like appearance             | 48 (38.1) | Functionality                    | 68 (32.4)  |
| 4       | Grabbing, picking up and holding | 46 (36.5) | Independence                     | 64 (30.5)  |
| 5       | Independence                     | 39 (31.0) | Heat/sweating                    | 56 (26.7)  |
| 6       | Household                        | 39 (31.0) | Weight                           | 56 (26.7)  |
| 7       | Work/job                         | 38 (30.2) | Need for prosthesis              | 54 (25.7)  |
| 8       | Usability                        | 35 (27.8) | Household                        | 52 (24.8)  |
| 9       | Overuse complaints               | 34 (27.0) | Self-care                        | 49 (23.3)  |
| 10      | Anonymity                        | 33 (26.2) | Usability                        | 49 (23.3)  |
| 11      | Transport                        | 31 (24.6) | Phantom limb pain                | 49 (23.3)  |
| 12      | Functionality                    | 31 (24.6) | Donning/doffing                  | 49 (23.3)  |
| 13      | Reliability                      | 31 (24.6) | Feeling comfortable              | 47 (22.4)  |
| 14      | Prosthesis fit                   | 30 (23.8) | Reliability                      | 47 (22.4)  |
| 15      | Heat/sweating                    | 30 (23.8) | Ease of control                  | 46 (21.9)  |
| 16      | Ease of control                  | 28 (22.2) | Work/job                         | 45 (21.4)  |
| 17      | Feeling comfortable              | 28 (22.2) | Life-like appearance             | 43 (20.5)  |
| 18      | Self-confidence                  | 27 (21.4) | Overuse complaints               | 42 (20.0)  |
| 19      | Self-care                        | 27 (21.4) | Prosthesis fit                   | 41 (19.5)  |
| 20      | Need for prosthesis              | 27 (21.4) | Anonymity                        | 39 (18.6)  |

### 4. Level of limb loss

| Ranking | At or above elbow level (N = 106)       |           | Below elbow level (N = 229)      |            |
|---------|-----------------------------------------|-----------|----------------------------------|------------|
|         | Item                                    | N (%)     | Item                             | N (%)      |
| 1       | Wearing comfort                         | 61 (57.5) | Wearing comfort                  | 120 (52.4) |
| 2       | Weight                                  | 38 (35.8) | Grabbing, picking up and holding | 87 (38.0)  |
| 3       | Heat/sweating                           | 32 (30.2) | Independence                     | 80 (34.9)  |
| 4       | Functionality                           | 32 (30.2) | Household                        | 74 (32.3)  |
| 5       | Donning/ doffing                        | 32 (30.2) | Life-like appearance             | 68 (29.7)  |
| 6       | Grabbing, picking up and holding        | 29 (27.4) | Functionality                    | 67 (29.3)  |
| 7       | Ease of control                         | 27 (25.5) | Self-care                        | 66 (28.8)  |
| 8       | Usability                               | 27 (25.5) | Weight                           | 66 (28.8)  |
| 9       | Feeling comfortable                     | 27 (25.5) | Reliability                      | 61 (26.6)  |
| 10      | Prosthesis fit                          | 26 (24.5) | Work/job                         | 60 (26.2)  |
| 11      | Self-confidence                         | 23 (21.7) | Need for prosthesis              | 60 (26.2)  |
| 12      | Independence                            | 23 (21.7) | Usability                        | 57 (24.9)  |
| 13      | Work/job                                | 23 (21.7) | Overuse complaints               | 55 (24.0)  |
| 14      | Overuse complaints                      | 22 (20.8) | Heat/sweating                    | 54 (23.6)  |
| 15      | Appearance in combination with clothing | 21 (19.8) | Anonymity                        | 51 (22.3)  |
| 16      | Life-like appearance                    | 21 (19.8) | Transport                        | 46 (20.1)  |
| 17      | Vulnerability/ robustness               | 20 (18.9) | Ease of control                  | 46 (20.1)  |
| 18      | Need for prosthesis                     | 20 (18.9) | Feeling comfortable              | 46 (20.1)  |
| 19      | Anonymity                               | 20 (18.9) | Prosthesis fit                   | 45 (19.7)  |
| 20      | Stabilize/ support objects              | 19 (17.9) | Leisure activities               | 39 (17.0)  |
|         | Phantom limb pain                       | 19 (17.9) | Embodiment                       | 39 (17.0)  |
|         | Embodiment                              | 19 (17.9) |                                  |            |

5. Type of prosthesis used most and no prosthesis use

| Ranking | Mono-grip myoelectric (N = 87)   |           | Multi-grip myoelectric (N = 29)  |           |
|---------|----------------------------------|-----------|----------------------------------|-----------|
|         | Item                             | N (%)     | Item                             | N (%)     |
| 1       | Wearing comfort                  | 45 (51.7) | Household                        | 16 (55.2) |
| 2       | Grabbing, picking up and holding | 44 (50.6) | Grabbing, picking up and holding | 15 (51.7) |
| 3       | Reliability                      | 36 (41.4) | Weight                           | 12 (41.4) |
| 4       | Independence                     | 34 (39.1) | Reliability                      | 12 (41.4) |
| 5       | Need for prosthesis              | 30 (34.5) | Independence                     | 11 (37.9) |
| 6       | Ease of control                  | 28 (32.2) | Work/job                         | 11 (37.9) |
| 7       | Functionality                    | 28 (32.2) | Speed of movements               | 10 (34.5) |
| 8       | Work/job                         | 27 (31.0) | Heat/sweating                    | 10 (34.5) |
| 9       | Household                        | 25 (28.7) | Functionality                    | 10 (34.5) |
| 10      | Self-care                        | 24 (27.6) | Dexterity                        | 9 (31.0)  |
| 11      | Overuse complaints               | 23 (26.4) | Wearing comfort                  | 9 (31.0)  |
| 12      | Life-like appearance             | 22 (25.3) | Self-care                        | 8 (27.6)  |
| 13      | Heat/sweating                    | 22 (25.3) | Overuse complaints               | 8 (27.6)  |
| 14      | Usability                        | 20 (23.0) | Leisure activities               | 7 (24.1)  |
| 15      | Expertise of guidance            | 19 (21.8) | Prosthesis fit                   | 7 (24.1)  |
| 16      | Feeling comfortable              | 19 (21.8) | Ease of control                  | 7 (24.1)  |
| 17      | Anonymity                        | 19 (21.8) | Embodiment                       | 7 (24.1)  |
| 18      | Stabilize/support objects        | 18 (20.7) | Vulnerability/robustness         | 6 (20.7)  |
| 19      | Water/dirt proof                 | 17 (19.5) | Natural movements                | 6 (20.7)  |
| 20      | Weight                           | 17 (19.5) | Usability                        | 6 (20.7)  |
|         |                                  |           | Expertise of guidance            | 6 (20.7)  |
|         |                                  |           | Donning/doffing                  | 6 (20.7)  |

| Ranking | Cosmetic/passive (N = 132)              |           | Body powered (N = 35)                   |           |
|---------|-----------------------------------------|-----------|-----------------------------------------|-----------|
|         | Item                                    | N (%)     | Item                                    | N (%)     |
| 1       | Wearing comfort                         | 79 (59.8) | Wearing comfort                         | 21 (60.0) |
| 2       | Life-like appearance                    | 50 (37.9) | Grabbing, picking up and holding        | 17 (48.6) |
| 3       | Weight                                  | 46 (34.8) | Usability                               | 12 (34.3) |
| 4       | Prosthesis fit                          | 41 (31.1) | Independence                            | 11 (31.4) |
| 5       | Anonymity                               | 39 (29.5) | Need for prosthesis                     | 10 (28.6) |
| 6       | Usability                               | 36 (27.3) | Feeling comfortable                     | 10 (28.6) |
| 7       | Donning/doffing                         | 36 (27.3) | Functionality                           | 9 (25.7)  |
| 8       | Appearance in combination with clothing | 35 (26.5) | Work/job                                | 8 (22.9)  |
| 9       | Household                               | 35 (26.5) | Life-like appearance                    | 8 (22.9)  |
| 10      | Independence                            | 33 (25.0) | Reliability                             | 8 (22.9)  |
| 11      | Need for prosthesis                     | 32 (24.2) | Self-care                               | 7 (20.0)  |
| 12      | Heat/ sweating                          | 32 (24.2) | Professional prosthesis maintenance     | 7 (20.0)  |
| 13      | Feeling comfortable                     | 32 (24.2) | Prosthesis fit                          | 7 (20.0)  |
| 14      | Functionality                           | 31 (23.5) | Ease of control                         | 7 (20.0)  |
| 15      | Self-confidence                         | 29 (22.0) | Dexterity                               | 7 (20.0)  |
| 16      | Work/job                                | 28 (21.2) | Self-maintenance                        | 7 (20.0)  |
| 17      | Stabilize/support objects               | 28 (21.2) | Anonymity                               | 7 (20.0)  |
| 18      | Self-care                               | 27 (20.5) | Donning/ doffing                        | 7 (20.0)  |
| 19      | Transport                               | 27 (20.5) | Water/dirt proof                        | 6 (17.1)  |
| 20      | Reactions from public                   | 25 (18.9) | Appearance in combination with clothing | 6 (17.1)  |
|         | Embodiment                              | 25 (18.9) | Overuse complaints                      | 6 (17.1)  |
|         |                                         |           | Natural movements                       | 6 (17.1)  |
|         |                                         |           | Skin irritation                         | 6 (17.1)  |
|         |                                         |           | Weight                                  | 6 (17.1)  |
|         |                                         |           | Embodiment                              | 6 (17.1)  |

| Ranking | No prosthesis (N = 40)            |           |
|---------|-----------------------------------|-----------|
|         | Item                              | N (%)     |
| 1       | Wearing comfort                   | 21 (52.5) |
| 2       | Weight                            | 20 (50.0) |
| 3       | Functionality                     | 19 (47.5) |
| 4       | Ease of control                   | 17 (42.5) |
| 5       | Grabbing, picking up and holding  | 12 (30.0) |
| 6       | Phantom limb pain                 | 12 (30.0) |
| 7       | Independence                      | 11 (27.5) |
| 8       | Overuse complaints                | 10 (25.0) |
| 9       | Heat/ sweating                    | 10 (25.0) |
| 10      | Feeling comfortable               | 9 (22.5)  |
| 11      | Embodiment                        | 9 (22.5)  |
| 12      | Self-confidence                   | 8 (20.0)  |
| 13      | Usability                         | 8 (20.0)  |
| 14      | Donning/doffing                   | 8 (20.0)  |
| 15      | Self-image                        | 7 (17.5)  |
| 16      | Work/job                          | 7 (17.5)  |
| 17      | Natural movements                 | 7 (17.5)  |
| 18      | Putting clothes on                | 7 (17.5)  |
| 19      | Feeling disabled                  | 7 (17.5)  |
| 20      | Phantom limb feeling              | 7 (17.5)  |
|         | Physical effort needed to control | 7 (17.5)  |
