# Supplementary material
Source: publisher figshare collection journal article supplement (https://tandf.figshare.com/articles/dataset/_/17069974)
Supplement: Supplementary file 3 [file 1]

## Supplementary Material 1

Items from the HealthFan survey that were selected more or less frequently by the subpopulations in comparison with the overall population (results depicted in Figure 3).

| Subgroup                                    | Items selected more frequently*                                                                                                                                                                                                                                                       | Items selected less frequently*                                                                            |
|---------------------------------------------|---------------------------------------------------------------------------------------------------------------------------------------------------------------------------------------------------------------------------------------------------------------------------------------|------------------------------------------------------------------------------------------------------------|
| Age 18 – 40 years                           | <ul style="list-style-type: none"> <li>Weight</li> <li>Work/job</li> <li>Ease of control</li> <li>Usability</li> <li>Anonymity</li> </ul>                                                                                                                                             | <ul style="list-style-type: none"> <li>Wearing comfort</li> </ul>                                          |
| Age 41 – 65 years                           | None                                                                                                                                                                                                                                                                                  | None                                                                                                       |
| Age ≥ 66 years                              | <ul style="list-style-type: none"> <li>Need for prosthesis</li> </ul>                                                                                                                                                                                                                 | None                                                                                                       |
| Women                                       | <ul style="list-style-type: none"> <li>Independence</li> <li>Household</li> <li>Life-like appearance</li> <li>Overuse complaints</li> <li>Anonymity</li> </ul>                                                                                                                        | <ul style="list-style-type: none"> <li>Grabbing, picking up, and holding</li> <li>Functionality</li> </ul> |
| Men                                         | <ul style="list-style-type: none"> <li>Ease of control</li> </ul>                                                                                                                                                                                                                     | None                                                                                                       |
| Congenital ULA                              | <ul style="list-style-type: none"> <li>Weight</li> <li>Life-like appearance</li> <li>Household</li> <li>Work/job</li> <li>Anonymity</li> </ul>                                                                                                                                        | None                                                                                                       |
| Acquired ULA                                | None                                                                                                                                                                                                                                                                                  | None                                                                                                       |
| ULA at or proximal from the elbow           | <ul style="list-style-type: none"> <li>Donning/doffing</li> </ul>                                                                                                                                                                                                                     | <ul style="list-style-type: none"> <li>Grabbing, picking up, and holding</li> </ul>                        |
| ULA distal from the elbow                   | <ul style="list-style-type: none"> <li>Household</li> <li>Self-care</li> </ul>                                                                                                                                                                                                        | None                                                                                                       |
| Mono-grip myoelectric prosthesis used most  | <ul style="list-style-type: none"> <li>Grabbing, picking up, and holding</li> <li>Reliability</li> <li>Independence</li> <li>Need for prosthesis</li> <li>Ease of control</li> <li>Work/job</li> </ul>                                                                                | None                                                                                                       |
| Multi-grip myoelectric prosthesis used most | <ul style="list-style-type: none"> <li>Household</li> <li>Grabbing, picking up, and holding</li> <li>Weight</li> <li>Reliability</li> <li>Independence</li> <li>Work/job</li> <li>Speed of movements</li> <li>Heat/sweating</li> <li>Dexterity</li> <li>Overuse complaints</li> </ul> | <ul style="list-style-type: none"> <li>Wearing comfort</li> </ul>                                          |
| Cosmetic/passive prosthesis used most       | <ul style="list-style-type: none"> <li>Wearing comfort</li> <li>Life-like appearance</li> <li>Prosthesis fit</li> <li>Anonymity</li> <li>Donning/doffing</li> <li>Appearance in combination with clothing</li> </ul>                                                                  | <ul style="list-style-type: none"> <li>Independence</li> </ul>                                             |
| Body-powered prosthesis used most           | <ul style="list-style-type: none"> <li>Wearing comfort</li> <li>Grabbing, picking up, and holding</li> <li>Usability</li> <li>Need for prosthesis</li> <li>Feeling comfortable</li> </ul>                                                                                             | None                                                                                                       |
| Non-prosthesis users                        | <ul style="list-style-type: none"> <li>Weight</li> <li>Functionality</li> <li>Ease of control</li> <li>Phantom limb pain</li> </ul>                                                                                                                                                   | None                                                                                                       |

Abbreviation: ULA = upper limb absence.

\* Only differences in frequency of at least 5% between sub- and overall population from items that were selected by >25% of the subpopulations were presented in this supplementary file.
